# Supplementary material for: Simple fluorene oxadiazole-based Ir(iii) complexes with AIPE properties: synthesis, explosive detection and electroluminescence studies
Source: Royal Society of Chemistry journal article supplement (doi:10.1039/c9dt02751c), 2019-01-01
Supplement: c9dt02751c1.pdf [file c9dt02751c1.pdf]

## Supplementary Materials

### **Simple Fluorene Oxadiazole-based Ir(III) Complexes with AIPE Property: Synthesis, Explosive Detection and Electroluminescence Studies**

Jia-Wei Liu,<sup>a</sup> Ya-Nan Xu,<sup>a</sup> Chun-Yan Qin,<sup>a</sup> Zi-Ning Wang,<sup>a</sup> Cong-Jin Wu,<sup>a</sup> Yong-Hua Li,<sup>\*a</sup> Shi Wang,<sup>\*a</sup> Kenneth Yin Zhang<sup>\*a</sup> and Wei Huang<sup>\*ab</sup>

<sup>a</sup> *Key Laboratory for Organic Electronics and Information Displays & Institute of Advanced Materials (IAM), Jiangsu National Synergistic Innovation Center for Advanced Materials (SICAM), Nanjing University of Posts & Telecommunications, Nanjing 210023, China.*

*E-mail: [iamswang@njupt.edu.cn](mailto:iamswang@njupt.edu.cn); [iamyzhang@njupt.edu.cn](mailto:iamyzhang@njupt.edu.cn); [iamyhli@njupt.edu.cn](mailto:iamyhli@njupt.edu.cn); [iamwhuang@nwpu.edu.cn](mailto:iamwhuang@nwpu.edu.cn)  
<http://smse.njupt.edu.cn/>*

<sup>b</sup> *Institute of Flexible Electronics, Northwestern Polytechnical University, Xi'an 710000, China.*

## **Table of Contents**

1. Synthetic Routes and Characterization of Ligands
2. Single-Crystal X-ray Crystallography
3. Photophysical Properties
4. Thermal Properties
5. Electrochemical Properties
6. Nitroexplosive Detection

### **Synthesis of 2-bromo-9,9-dihexyl-9H-fluorene (2)**

A mixture of 2-bromo-9H-fluorene **1** (5 g, 20 mmol), TBAB (0.3287 g, 1.025 mmol), 50% NaOH 2 mL, DMSO 20 mL was stirred 12 h at 50 °C. After cooling to room temperature, the solution was poured into water and extracted with dichloromethane. The organic phase was dried over anhydrous sodium sulfate, filtered, and concentrated to dryness. The crude was purified by column chromatography on silica gel to afford a transparent liquid **2** (7.525 g, 18.22 mmol, 89%). <sup>1</sup>H NMR (400 MHz, CDCl<sub>3</sub>) δ = 7.70 (s, 1H), 7.59 (d, *J*=7.8, 1H), 7.56 – 7.45 (m, 2H), 7.36 (s, 3H), 2.00 (d, *J*=4.1, 4H), 1.14 (dd, *J*=18.4, 11.5, 12H), 0.82 (t, *J*=6.2, 6H), 0.74 (s, 4H). <sup>13</sup>C NMR (101 MHz, CDCl<sub>3</sub>) δ 151.43, 145.75, 139.18, 131.30, 129.01, 127.30, 126.48, 123.12, 120.87, 120.26, 119.88, 109.95, 77.54, 77.22, 76.90, 55.51, 40.14, 31.48, 29.60, 23.72, 22.57, 14.03.

### **Synthesis of 2-cyano-9,9-dihexyl-9H-fluorene (3)**

A mixture of compound **2** (7.525 g, 18.22 mmol), CuCN (3.275 g, 28.95 mmol) was dissolved in dry and degassed DMF 25 mL, and stirred for 24 h at 155 °C under a nitrogen atmosphere. After cooling to room temperature, ammonia was added to the solution to dissolve CuCN and precipitated product. After stirring for 30 min, the mixed solution was filtered and washed with water. The crude was purified by column chromatography on silica gel to afford a pale yellow liquid **3** (5.225 g, 14.47 mmol, 80%). <sup>1</sup>H NMR (400 MHz, CDCl<sub>3</sub>) δ = 7.75 (td, *J*=6.0, 1.4, 2H), 7.66 – 7.60 (m, 2H), 7.43 – 7.33 (m, 3H), 2.00 (dd, *J*=10.6, 6.1, 4H), 1.21 – 0.95 (m, 12H), 0.76 (t, *J*=7.1, 6H), 0.66 – 0.50 (m, 4H). <sup>13</sup>C NMR (101 MHz, CDCl<sub>3</sub>) δ 151.43 (d, *J* = 7.4 Hz), 145.75, 139.18, 131.30, 129.01, 127.30, 126.48, 123.12, 120.87, 120.26, 119.88, 109.95, 77.54, 77.22, 76.90, 55.51, 40.14, 31.48, 29.60, 23.72, 22.57, 14.03.

### **Synthesis of 2-(9,9-dihexyl-9H-fluoren-2-yl)-1H-tetrazole (4)**

A mixture of compound **3** (5.225 g, 14.47 mmol), NEt<sub>3</sub> HCl (3.975 g, 28.95 mmol), NaN<sub>3</sub> (1.882 g, 28.95 mmol) was dissolved in dry and degassed DMF 25 mL, and stirred for 72 h at 125 °C under a nitrogen atmosphere. After cooling to room temperature, the solution was poured into water and extracted with ethyl acetate. The organic phase was dried over anhydrous sodium sulfate, filtered, and

concentrated to dryness. The crude was purified by column chromatography on silica gel to afford a white powder **4** (15.6 g, 9.84 mmol, 68%). <sup>1</sup>H NMR (400 MHz, CDCl<sub>3</sub>) δ = 8.44 (d, *J*=0.9, 1H), 8.36 (dd, *J*=8.0, 1.4, 1H), 7.90 (d, *J*=7.9, 1H), 7.77 – 7.71 (m, 1H), 7.38 – 7.30 (m, 3H), 2.06 (dtd, *J*=16.6, 13.3, 6.1, 4H), 1.06 – 0.87 (m, 12H), 0.67 (t, *J*=7.1, 6H), 0.63 – 0.49 (m, 4H). <sup>13</sup>C NMR (101 MHz, CDCl<sub>3</sub>) δ 152.30 (s), 151.45, 145.11, 139.76, 128.40, 127.07, 126.75, 123.03, 122.27, 121.35, 120.62, 55.69, 40.30, 31.49, 29.65, 23.80, 13.95.

#### **Synthesis of 2-(9,9-hexyl-9H-fluoren-2-yl)-5-mesityl-1,3,4-oxadiazole (fom)**

A mixture of compound **4** (2.5 g, 6.2 mmol), 2,4,6-trimethylbenzoyl chloride (3.3 g, 18.6 mmol) was dissolved in dry and degassed pyridine 15 mL, and stirred for 24 h at 110 °C. After cooling to room temperature, hydrochloric acid was added to solution to reaction with pyridine. After stirring for 1 h, the solution was poured into water and extracted with dichloromethane. The organic phase was dried over anhydrous sodium sulfate, filtered, and concentrated to dryness. The crude was purified by column chromatography on silica gel to afford an oily liquid **fom** (2.6 g, 5.0 mmol, 80%). <sup>1</sup>H NMR (400 MHz, CDCl<sub>3</sub>) δ = 8.19 (s, 1H), 8.07 (dd, *J*=7.9, 1.2, 1H), 7.83 (d, *J*=7.9, 1H), 7.78 – 7.75 (m, 1H), 7.41 – 7.34 (m, 3H), 7.01 (s, 2H), 2.37 (d, *J*=5.8, 9H), 2.06 (dd, *J*=16.2, 8.3, 4H), 1.16 – 0.98 (m, 12H), 0.76 (t, *J*=7.0, 6H), 0.65 (d, *J*=6.1, 4H). <sup>13</sup>C NMR (101 MHz, CDCl<sub>3</sub>) δ 165.60, 163.74, 151.58, 144.86, 141.04, 139.86, 138.80, 128.93, 128.36, 127.11, 125.93, 123.06, 122.32, 121.32, 120.37, 55.46, 40.33, 31.53, 29.68, 23.79, 22.61, 21.35, 20.57, 14.04.

#### **Synthesis of 2-(2,6-difluorophenyl)-5-(9,9-dihexyl-9H-fluoren-2-yl)-1,3,4-oxadiazole (fof)**

A mixture of compound **4** (2.5 g, 6.2 mmol), 2,6-difluorophenyl chloride (3.28 g, 18.6 mmol) was dissolved in dry and degassed pyridine 15 mL, and stirred for 24 h at 110 °C. After cooling to room temperature, hydrochloric acid was added to solution to reaction with pyridine. After stirring for 1 h, the solution was poured into water and extracted with dichloromethane. The organic phase was dried over anhydrous sodium sulfate, filtered, and concentrated to dryness. The crude was purified by column chromatography on silica gel to afford an oily liquid **fof** (2.5 g, 5 mmol, 80%). <sup>1</sup>H

NMR (400 MHz, CDCl<sub>3</sub>)  $\delta$  = 8.16 (d,  $J$ =1.1, 1H), 8.11 (dd,  $J$ =7.9, 1.5, 1H), 7.84 (d,  $J$ =7.9, 1H), 7.80 – 7.73 (m, 1H), 7.54 (tt,  $J$ =8.5, 6.1, 1H), 7.42 – 7.32 (m, 3H), 7.18 – 7.07 (m, 2H), 2.14 – 1.92 (m, 4H), 1.14 – 0.95 (m, 12H), 0.74 (t,  $J$ =7.1, 6H), 0.62 (dt,  $J$ =14.1, 7.2, 4H). <sup>13</sup>C NMR (101 MHz, CDCl<sub>3</sub>)  $\delta$  166.07, 151.58, 145.14, 139.81, 133.39, 128.39, 127.07, 126.28, 123.05, 121.79, 121.54, 120.51, 120.24, 112.56, 112.31, 55.48, 40.30, 31.50, 29.63, 23.75, 22.56, 13.99.

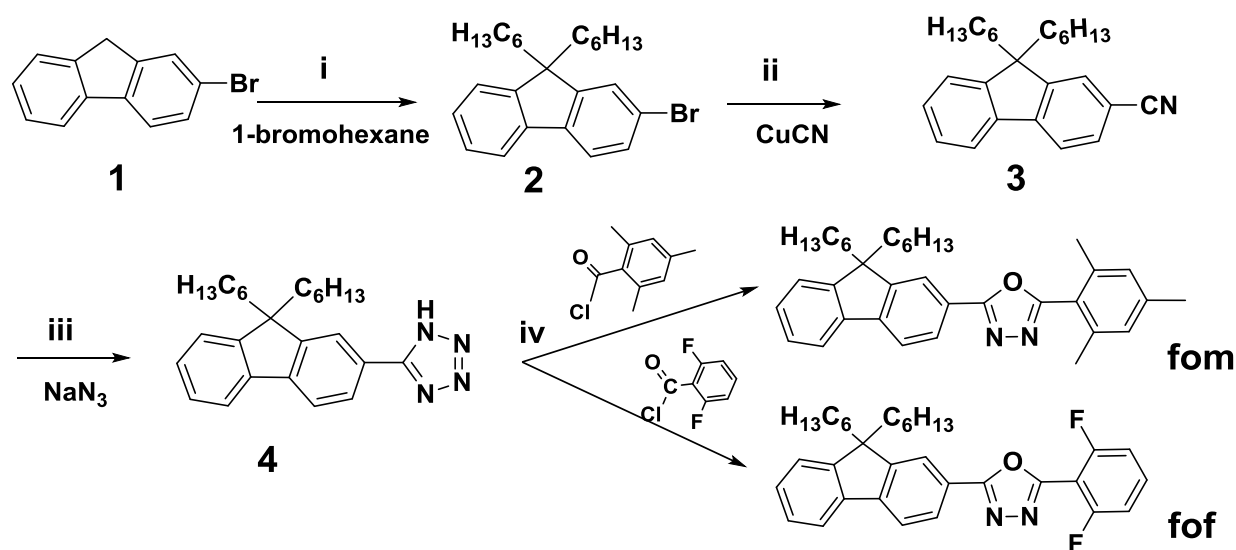

**Scheme S1** Synthetic route of cyclometalating ligands **fom** and **fof**; reaction condition: (i) DMSO, 50% NaOH, TBAB, 12 h; (ii) DMF, N<sub>2</sub>, 155 °C, 24 h; (iii) NEt<sub>3</sub> HCl, DMF, N<sub>2</sub>, 125 °C, 72 h; (iv) pyridine, 110 °C, 24 h.

### Synthesis of Ir(**fom**-Et)<sub>2</sub>(pic)

The steps of the synthesis refer to complex **Ir(fom)<sub>2</sub>(pic)**. <sup>1</sup>H NMR (400 MHz, CDCl<sub>3</sub>)  $\delta$  = 8.29 (d,  $J$ =7.7, 1H), 7.93 (d,  $J$ =4.8, 1H), 7.83 (ddt,  $J$ =25.3, 16.6, 6.6, 3H), 7.59 – 7.42 (m, 5H), 7.29 (s, 2H), 7.24 (d,  $J$ =1.0, 4H), 7.04 (s, 4H), 2.45 (d,  $J$ =18.3, 12H), 2.38 (d,  $J$ =4.9, 6H), 1.27 (d,  $J$ =11.6, 10H), 0.36 (dt,  $J$ =26.5, 7.1, 10H). <sup>13</sup>C NMR (101 MHz, CDCl<sub>3</sub>)  $\delta$  = 177.41, 176.58, 173.55, 162.71, 153.02, 151.31, 151.28, 149.55, 146.18, 145.54, 145.02, 144.22, 143.70, 141.70, 141.68, 140.95, 140.50, 139.13, 138.98, 137.42, 129.13, 129.06, 128.94, 128.07, 127.61, 127.41, 127.28, 126.64, 126.48, 125.63, 125.07, 124.67, 123.06, 122.86,



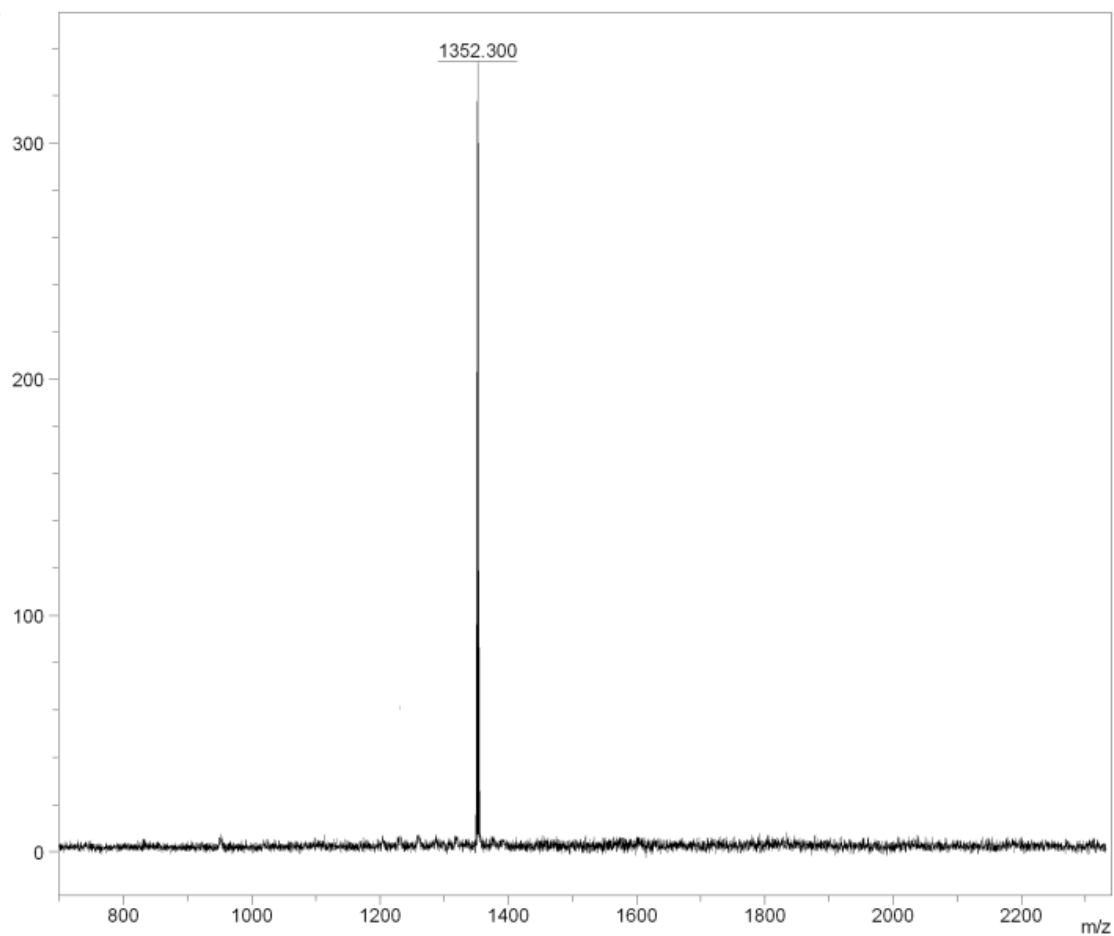

**Figure S3** The MALDI-TOF mass spectrum of the complex **Ir(fom)<sub>2</sub>(pic)**.

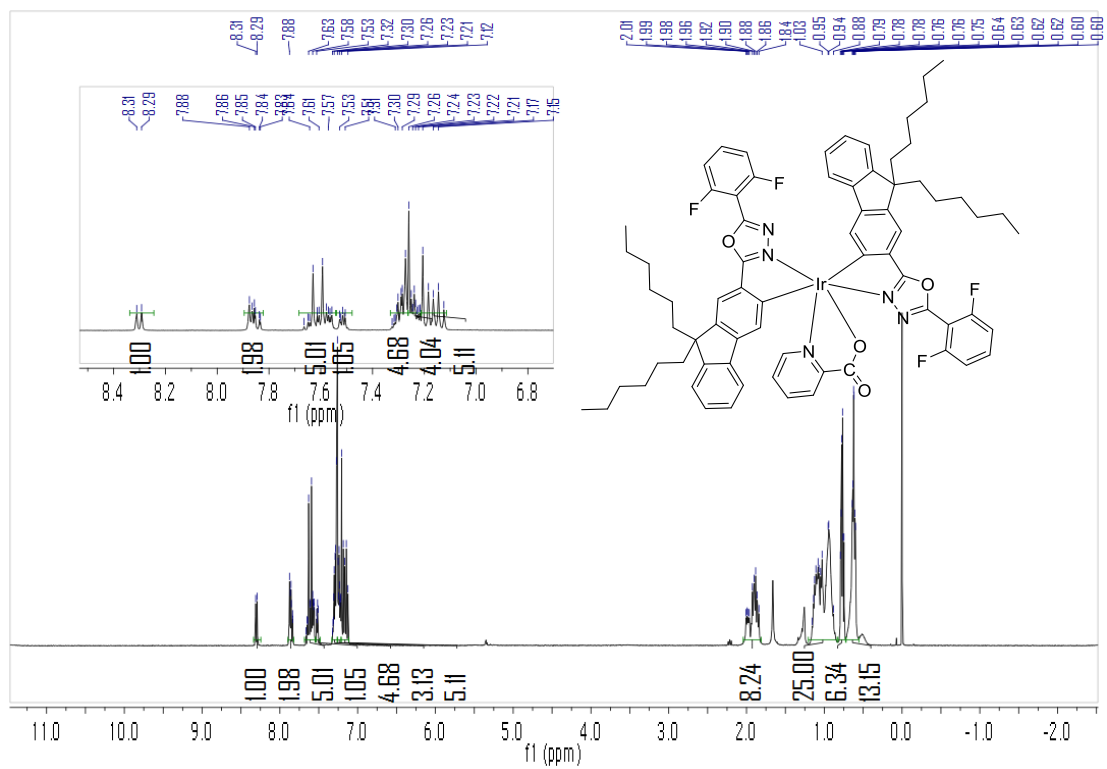

**Figure S4**  $^1\text{H}$  NMR spectrum of the complex **Ir(fof)<sub>2</sub>(pic)**.

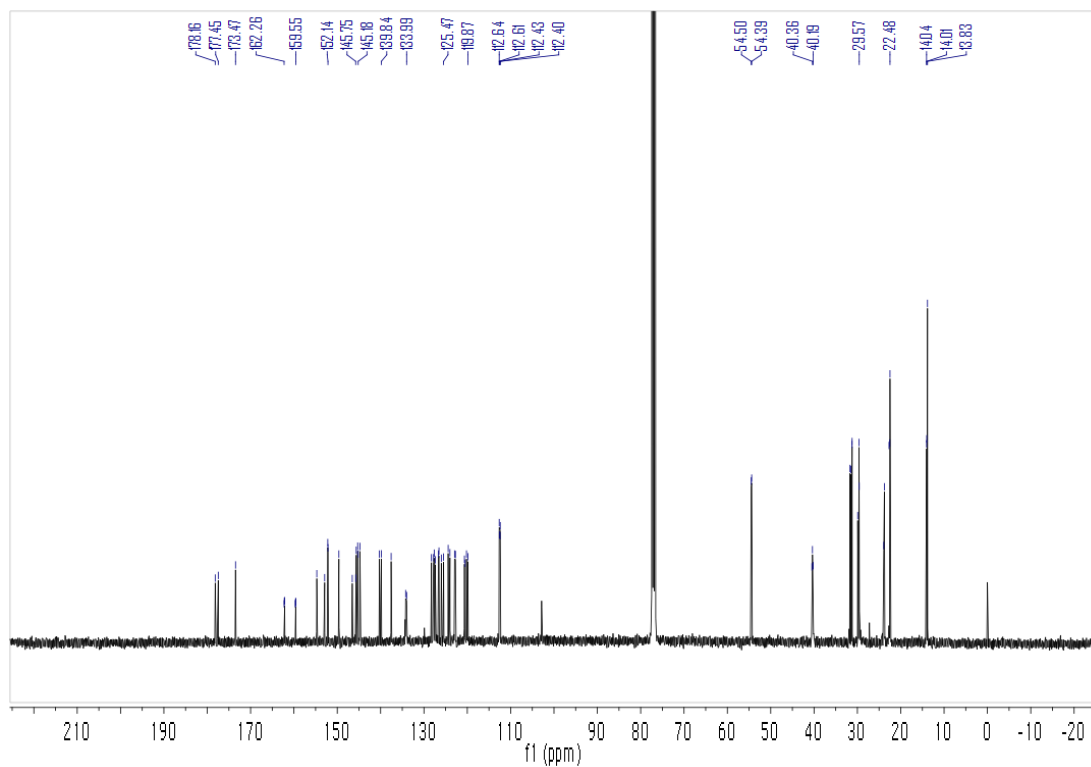

**Figure S5**  $^{13}\text{C}$  NMR spectrum of the complex  $\text{Ir}(\text{fof})_2(\text{pic})$ .

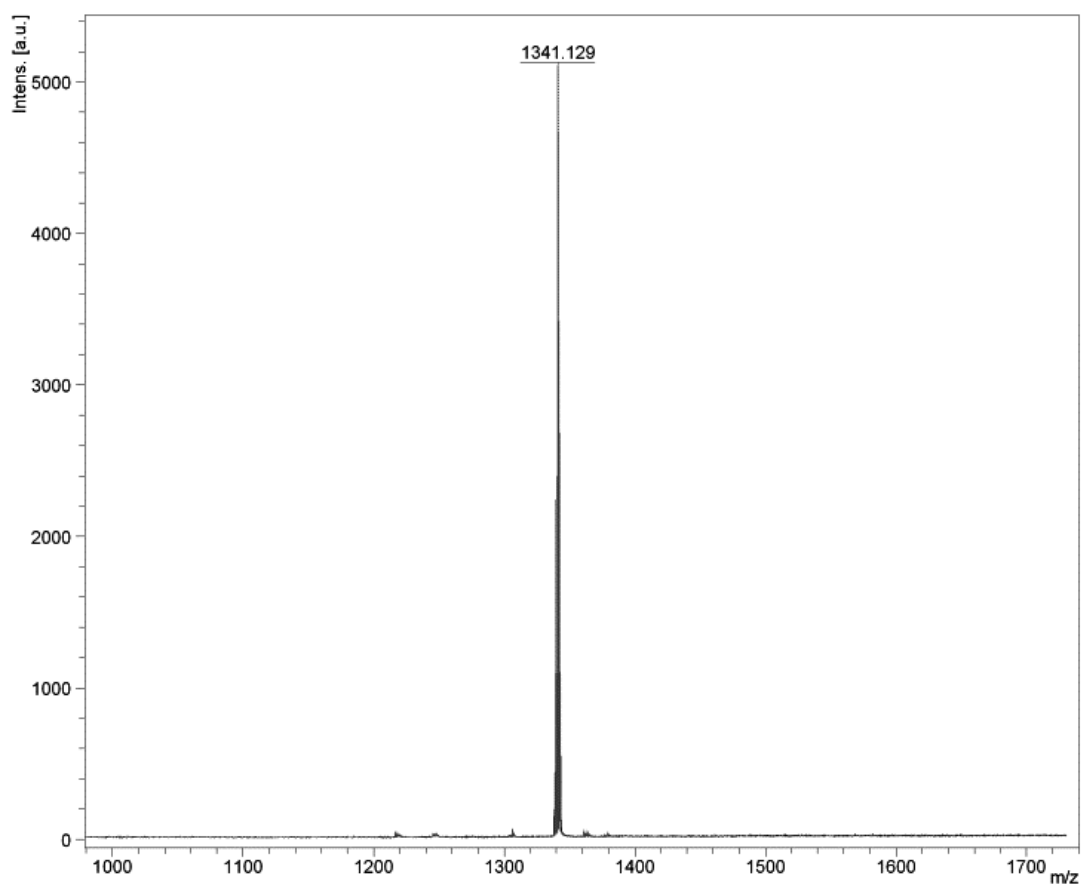

**Figure S6** The MALDI-TOF mass spectrum of the complex  $\text{Ir}(\text{fof})_2(\text{pic})$ .



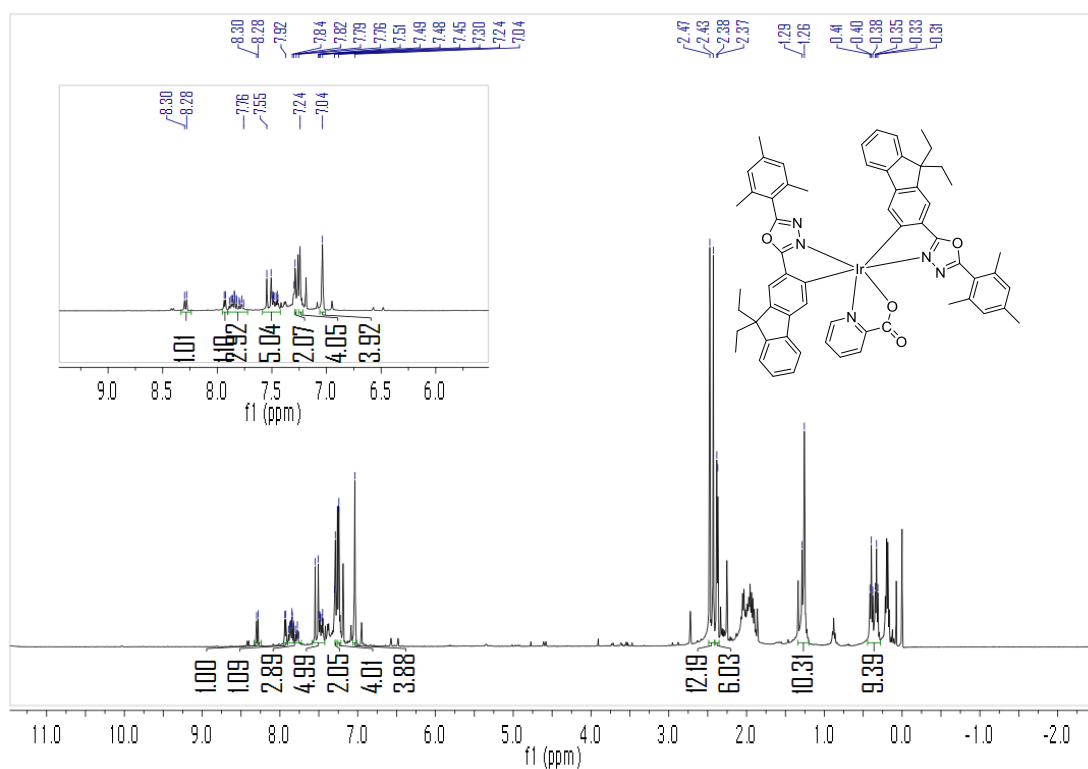

**Figure S7** <sup>1</sup>H NMR spectrum of the complex **Ir(fom-Et)<sub>2</sub>(pic)**.

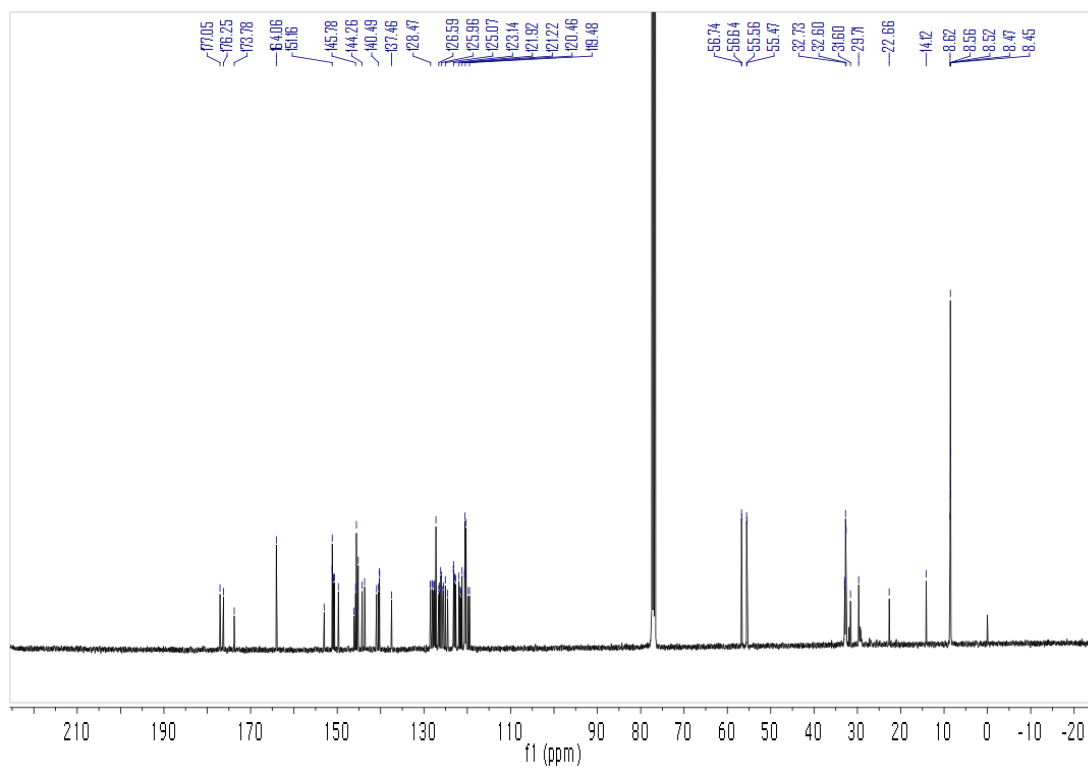

**Figure S8** <sup>13</sup>C NMR spectrum of the complex **Ir(fom-Et)<sub>2</sub>(pic)**.

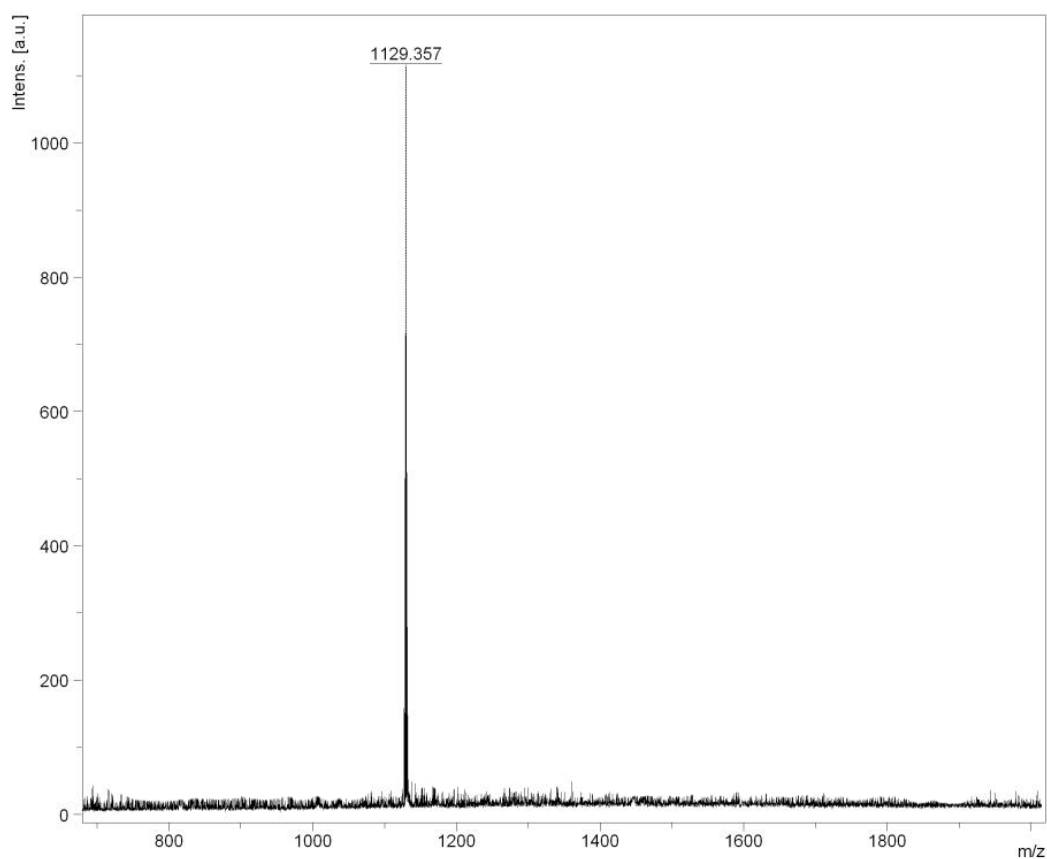

**Figure S9** The MALDI-TOF mass spectrum of the complex **Ir(fom-Et)<sub>2</sub>(pic)**.

**Table S1** Crystallographic data of **Ir(fom-Et)<sub>2</sub>(pic)**

| Complex                  | <b>Ir(fom-Et)<sub>2</sub>(pic)</b>                              |
|--------------------------|-----------------------------------------------------------------|
| Formula                  | C <sub>62</sub> H <sub>58</sub> IrN <sub>5</sub> O <sub>4</sub> |
| Formula weight           | 1129.33                                                         |
| <i>T</i> (K)             | 100.05                                                          |
| Crystal system           | triclinic                                                       |
| Space group              | P-1                                                             |
| <i>a</i> /Å              | 15.139(6)                                                       |
| <i>b</i> /Å              | 15.844(6)                                                       |
| <i>c</i> /Å              | 16.702(7)                                                       |
| <i>α</i> /°              | 64.615(7)                                                       |
| <i>β</i> /°              | 76.626(9)                                                       |
| <i>γ</i> /°              | 61.703(8)                                                       |
| <i>V</i> /Å <sup>3</sup> | 3185(2)                                                         |

|                                                           |                |
|-----------------------------------------------------------|----------------|
| Z                                                         | 2              |
| $D_{\text{calc}}/\text{cm}^3$                             | 1.178          |
| $\mu/\text{mm}^{-1}$                                      | 2.140          |
| $F(000)$                                                  | 1148.0         |
| Range of transm factors (deg)                             | 2.7 to 50.018  |
| Reflections collected                                     | 10928          |
| Unique reflections                                        | 8053           |
| Date/restraints/parameters                                | 10928/448/717  |
| Unique( $R_{\text{int}}$ )                                | 10928(0.0563)  |
| $R_1^{\text{a}}, wR_2^{\text{b}}$ [ $I \geq 2\sigma(I)$ ] | 0.0822, 0.1929 |
| $R_1^{\text{a}}, wR_2^{\text{b}}$ [all data]              | 0.1151, 0.2098 |
| GOF on $F^2$                                              | 1.060          |

$$R_1^{\text{a}} = \frac{\sum ||F_0| - |F_c||}{\sum |F_0|}, wR_2^{\text{b}} = \left[ \frac{\sum w(F_0^2 - F_c^2)^2}{\sum w(F_0^2)} \right]^{1/2}.$$

$$\text{GOF} = \left[ \frac{\sum w|F_0| - |F_c|}{(N_{\text{obs}} - N_{\text{param}})} \right]^{1/2}.$$

**Table S2** Selected bond lengths (Å) and selected bond angles (°) of **Ir(fom-Et)<sub>2</sub>(pic)**

| Bond length | Parameter (Å) |
|-------------|---------------|
| Ir1-N3      | 2.047(7)      |
| Ir1-N2      | 2.038(7)      |
| Ir1-C17     | 2.044(9)      |
| Ir1-C45     | 2.032(9)      |
| Ir1-O3      | 2.209(10)     |
| Ir1-N5      | 2.079(16)     |

| Angle      | Parameter (°) |
|------------|---------------|
| N3-Ir1-O3  | 100.7(3)      |
| N3-Ir1-N5  | 99.1(6)       |
| N2-Ir1-N3  | 171.5(3)      |
| N2-Ir1-C17 | 93.9(3)       |
| N2-Ir1-O3  | 86.4(3)       |
| N2-Ir1-N5  | 88.9(6)       |
| C17-Ir1-N3 | 79.4(3)       |

|             |          |
|-------------|----------|
| C17-Ir1-O3  | 176.7(4) |
| C17-Ir1-N5  | 162.7(7) |
| C45-Ir1-N3  | 95.2(4)  |
| C45-Ir1-N2  | 80.0(3)  |
| C45-Ir1-C17 | 94.2(4)  |
| C45-Ir1-O3  | 89.1(4)  |
| C45-Ir1-N5  | 103.1(7) |
| N5A-Ir1-O3  | 78.0(4)  |

---

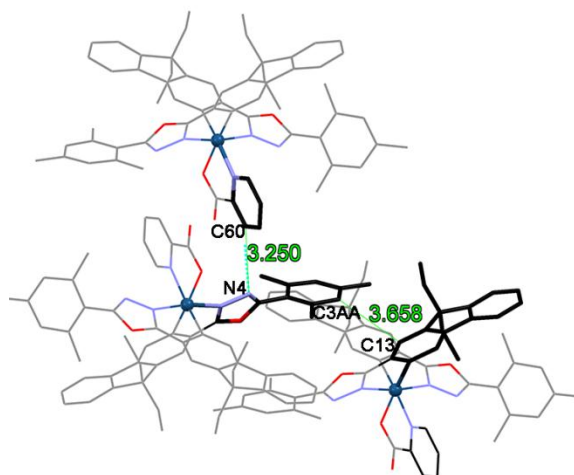

**Figure S10** Partial crystal packing diagram for the case of  $57.47^\circ$  dihedral angle.

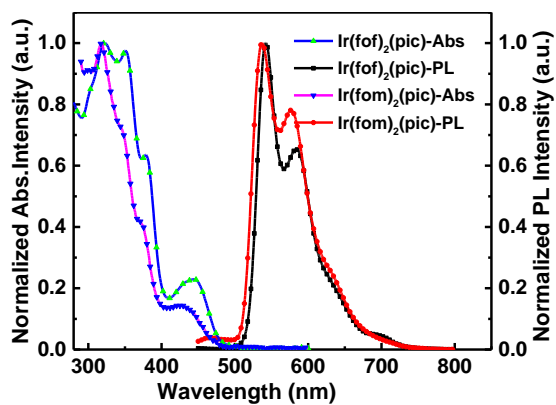

**Figure S11** Absorption spectra and photoluminescence spectra of **Ir(fom)<sub>2</sub>(pic)** and **Ir(fof)<sub>2</sub>(pic)**.

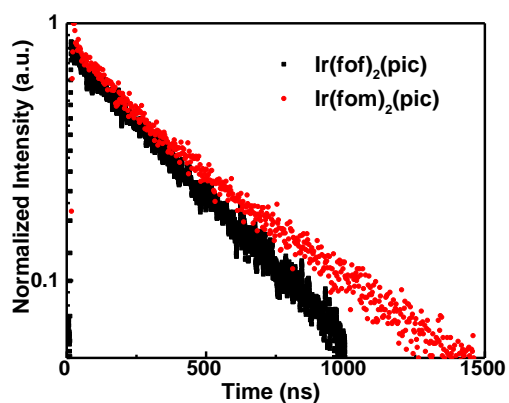

**Figure S12** Excited-state lifetimes of **Ir(fom)<sub>2</sub>(pic)** and **Ir(fof)<sub>2</sub>(pic)**.

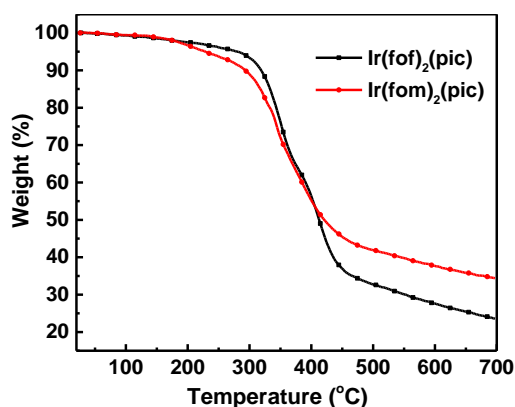

**Figure S13** TGA curves of **Ir(fom)<sub>2</sub>(pic)** and **Ir(fof)<sub>2</sub>(pic)**.

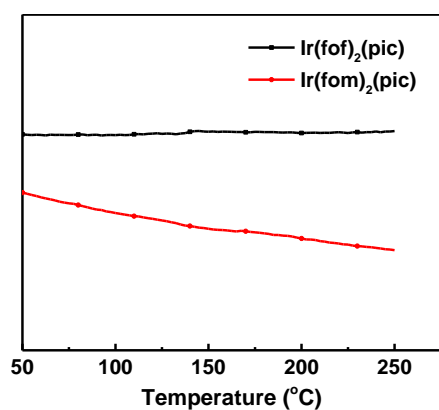

**Figure S14** DSC curves of **Ir(fom)<sub>2</sub>(pic)** and **Ir(fof)<sub>2</sub>(pic)**.

**Table S3** Absorption and photoluminescence data of the complexes.

| Complex                    | $\lambda_{\text{Abs}}^{[\text{a}]}$ (nm) | $\lambda_{\text{PL}}^{[\text{a}]}$ (nm) | $\tau_1$ (ns) | $\tau_2$ (ns) | $\tau^{[\text{b}]}$ (ns) | $\Phi_{\text{f}}^{[\text{c}]}$ | $T_{\text{d}}^{[\text{d}]}$ (°C) |
|----------------------------|------------------------------------------|-----------------------------------------|---------------|---------------|--------------------------|--------------------------------|----------------------------------|
| Ir(fom) <sub>2</sub> (pic) | 318, 340,<br>367, 427                    | 538,<br>578                             | 187.2/14.89%  | 586.6/85.11%  | 527.1                    | 0.24                           | 229                              |
| Ir(fof) <sub>2</sub> (pic) | 322, 350,<br>379, 443                    | 542,<br>585                             | 380.4/100%    | -             | 380.4                    | 0.27                           | 279                              |

[a] Absorption spectra and photoluminescence spectra were measured in CH<sub>2</sub>Cl<sub>2</sub> solution with the

concentration of  $10^{-5}$  M at room temperature; [b]  $\tau$  lifetimes were measured in  $\text{CH}_2\text{Cl}_2$  solution ( $5 \times 10^{-5}$  M),  $\lambda_{\text{exc}} = 370$  nm at room temperature. [c] Solid state phosphorescence quantum efficiency was determined by calibrated integrating sphere system at 298 K. [d] Temperature with 5% weight loss measured by TGA with a heating rate of  $10^\circ\text{C min}^{-1}$  under  $\text{N}_2$ .

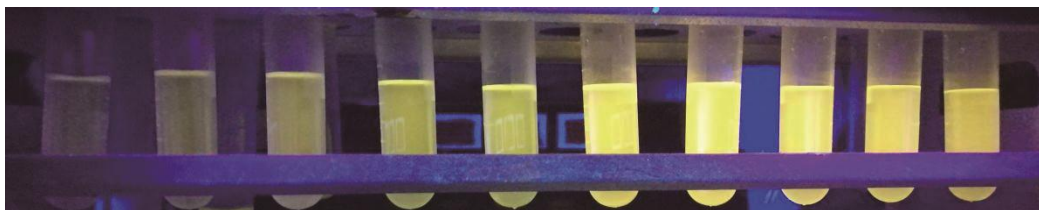

**Figure S15** Photograph of  $\text{Ir}(\text{fom})_2(\text{pic})$  in acetone-water mixtures with different water volume fractions ( $f_w$ ) taken under UV illumination ( $\lambda_{\text{exc}} = 365$  nm).

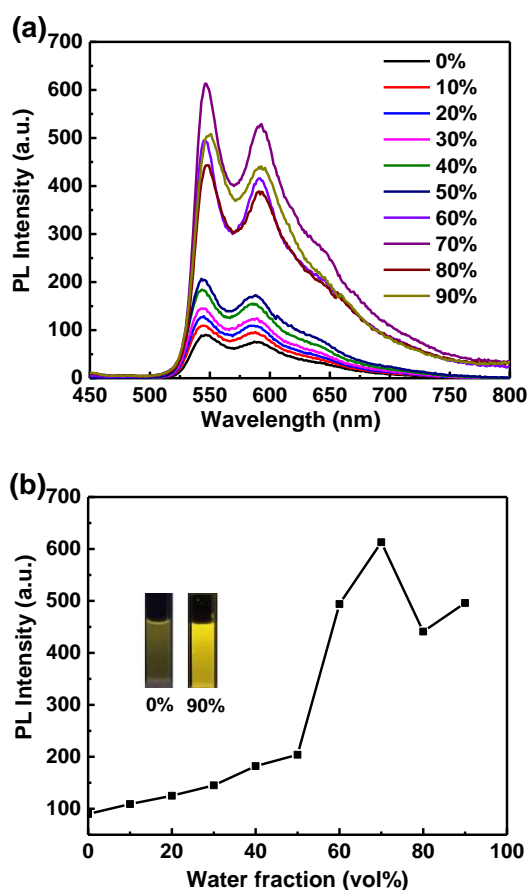

**Figure S16** (a) Emission spectra of  $\text{Ir}(\text{fom-Et})_2(\text{pic})$  ( $10^{-5}$  M) in acetone-water mixtures with different water fractions (0-90%) at room temperature ( $\lambda_{\text{exc}} = 410$  nm). (b) The profile of PL peak intensity vs. acetone-water mixtures with different water fractions (0-90%).

The electrochemical properties of complexes were examined by cyclic voltammetry in  $\text{CH}_2\text{Cl}_2$  solution with tetrabutylammonium hexafluorophosphate

(0.10 mol L<sup>-1</sup>) as supporting electrolyte. The HOMO energy level was estimated according to the following equation (1) from the onset of oxidation potential relative to the vacuum level. The LUMO energy level was calculated by the equation (2).  $E_g$  was estimated by the low energy cutoff wavelength of the absorption spectrum. All the results are summarized in Table S4.

$$E_{\text{HOMO}} = -[E_{\text{ox}} - E_{(\text{fc}/\text{fc}^+)} + 4.8] \text{ eV} \quad (1)$$

$$E_{\text{LUMO}} = E_{\text{HOMO}} + E_g, E_g = 1240/\lambda_{\text{cutoff}} \quad (2)$$

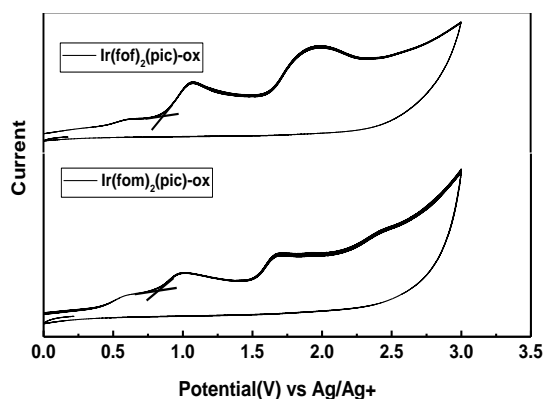

**Figure S17** Cyclic voltammograms of **Ir(fom)<sub>2</sub>(pic)** and **Ir(fof)<sub>2</sub>(pic)**.

**Table S4** Electrochemical for **Ir(fom)<sub>2</sub>(pic)** and **Ir(fof)<sub>2</sub>(pic)**

| complex                         | $E_{\text{ox}}^{\text{cv}}$ (V) | HOMO <sup>cv</sup> (eV) | LUMO <sup>cv</sup> (eV) | $E_g^{\text{opt}}$ [a] (eV) |
|---------------------------------|---------------------------------|-------------------------|-------------------------|-----------------------------|
| <b>Ir(fom)<sub>2</sub>(pic)</b> | 0.83                            | -5.49                   | -2.97                   | 2.52                        |
| <b>Ir(fof)<sub>2</sub>(pic)</b> | 0.87                            | -5.53                   | -3.13                   | 2.40                        |

[a] optical band gap, estimated from the absorption edge.

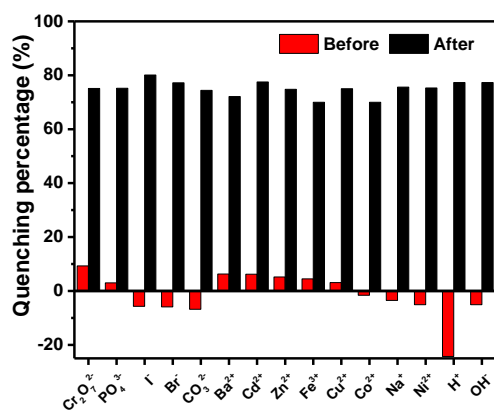

**Figure S18** Quenching percentage of complex **Ir(fom)<sub>2</sub>(pic)** obtained for addition of different potassium salt (including  $\text{Cr}_2\text{O}_7^{2-}$ ,  $\text{PO}_4^{3-}$ ,  $\text{I}^-$ ,  $\text{Br}^-$ ,  $\text{CO}_3^{2-}$ ) and chloride salt (including  $\text{Ba}^{2+}$ ,  $\text{Cd}^{2+}$ ,  $\text{Zn}^{2+}$ ,  $\text{Fe}^{3+}$ ,  $\text{Cu}^+$ ,  $\text{Co}^{2+}$ ,  $\text{Na}^+$ ,  $\text{Ni}^{2+}$ ) (20  $\mu\text{L}$ ,  $10^{-2}$  M), pH condition (pH = 1, pH = 14), and after addition of PA (20  $\mu\text{L}$ ,  $10^{-2}$  M).

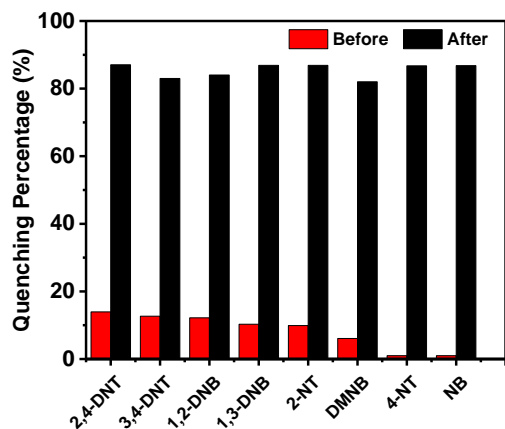

**Figure S19** Quenching percentage of complex  $\text{Ir}(\text{fom})_2(\text{pic})$  with analytes (20  $\mu\text{L}$ ) in acetone–water (V/V = 3:7) mixtures before and after addition of 20  $\mu\text{L}$  PA.

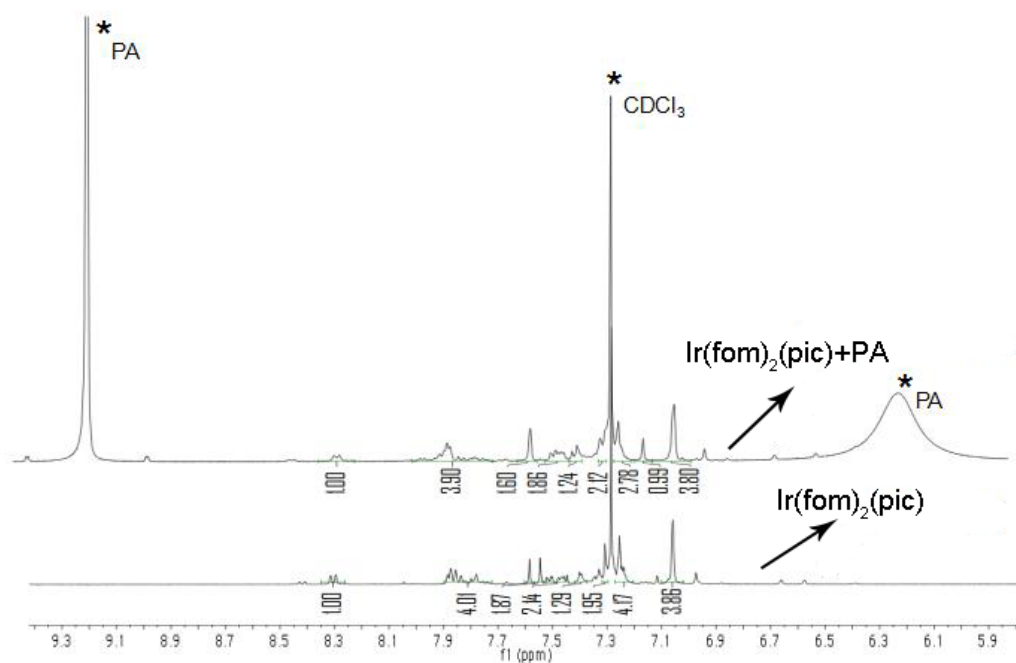

**Figure S20**  $^1\text{H}$  NMR spectra of complex  $\text{Ir}(\text{fom})_2(\text{pic})$  before and after addition of PA.

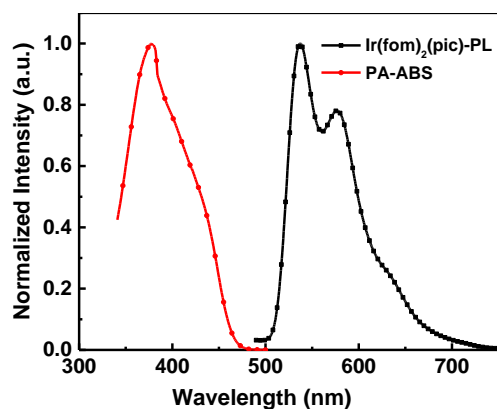

**Figure S21** Absorption spectrum of PA and emission spectrum of  $\text{Ir}(\text{fom})_2(\text{pic})$ .



**Table S5** Comparison with previous reports.

| Number | Quenching constants $K_{sv}$ ( $M^{-1}$ ) | Limit of detection (M) | Ref.      |
|--------|-------------------------------------------|------------------------|-----------|
| 1      | $3.37 \times 10^4$                        | $3.17 \times 10^{-7}$  | This work |
| 2      | $4.60 \times 10^4$                        | $9.80 \times 10^{-7}$  | 1         |
| 3      | $4.05 \times 10^4$                        | $1.87 \times 10^{-7}$  | 2         |
| 4      | $3.79 \times 10^6$                        | $1.00 \times 10^{-8}$  | 3         |
| 5      | $8.00 \times 10^4$                        | $1.00 \times 10^{-7}$  | 4         |
| 6      | $1.90 \times 10^5$                        | $6.5 \times 10^{-8}$   | 5         |
| 7      | $3.2 \times 10^5$                         | $1.5 \times 10^{-7}$   | 6         |
| 8      | $3.50 \times 10^4$                        | NA                     | 7         |
| 9      | $2.9 \times 10^4$                         | NA                     | 8         |

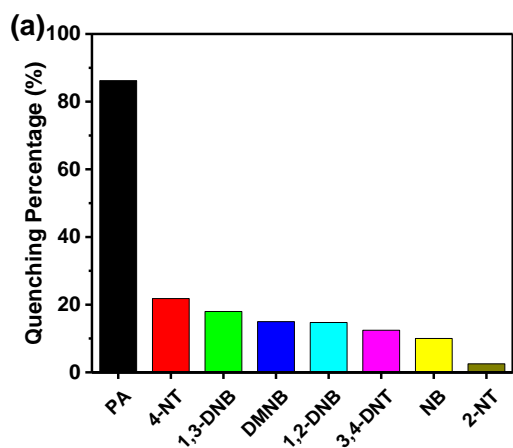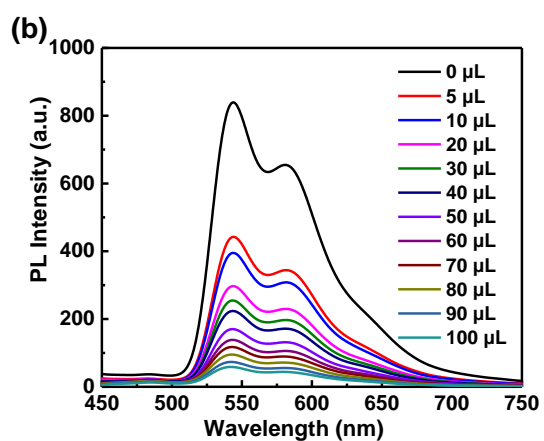

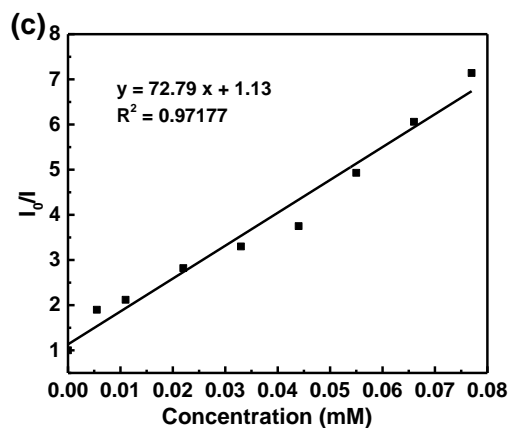

**Figure S22** (a) Quenching percentage of complex **Ir(fom)<sub>2</sub>(pic)** obtained for different analytes (20  $\mu$ L) in acetone–water (V/V = 1:9) mixture; (b) PL spectra of complex **Ir(fom)<sub>2</sub>(pic)** in acetone–water (V/V = 1:9) containing different amounts of PA; (c) Corresponding Stern–Volmer plot.

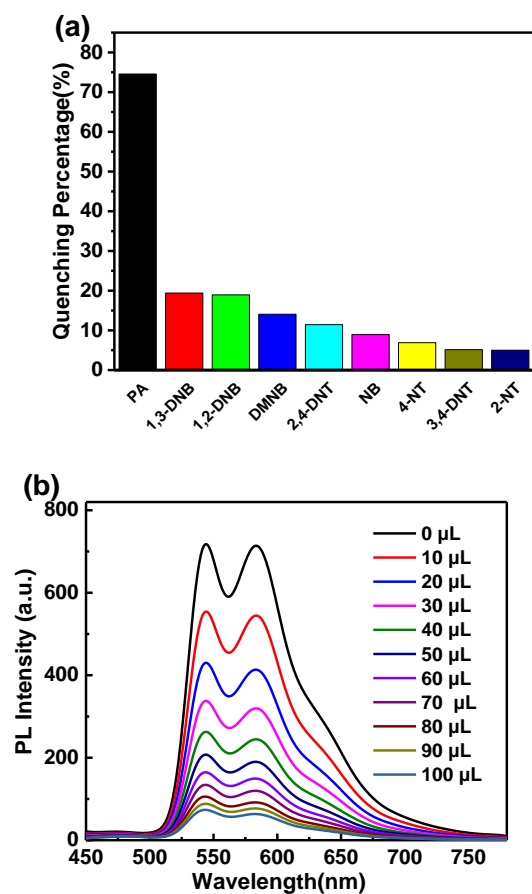

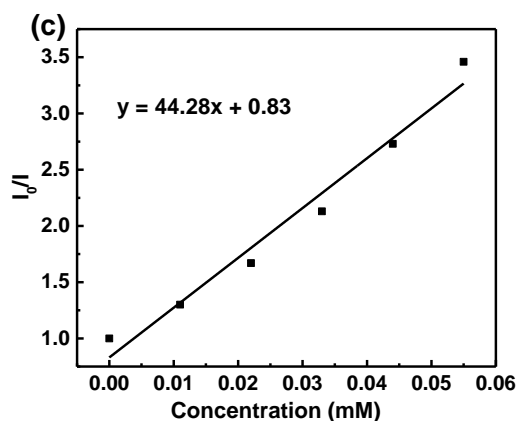

**Figure S23** (a) Quenching percentage of complex **Ir(fof)<sub>2</sub>(pic)** obtained for different analytes (20  $\mu$ L,  $10^{-2}$  M); (b) PL spectra of complex **Ir(fof)<sub>2</sub>(pic)** in acetone–water (V/V = 1:9) containing different amounts of PA; (c) Corresponding Stern–Volmer plot of PA.

## References

1. R. Lv, J. Wang, Y. Zhang, H. Li, L. Yang, S. Liao, W. Gu and X. Liu, *J. Mater. Chem. A* 2016, **4**, 15494-15500.
2. A. Buragohain, M. Yousufuddin, M. Sarma and S. Biswas, *Cryst. Growth. Des.* 2016, **16**, 842-851.
3. L.-L. Wen, X.-G. Hou, G.-G. Shan, W.-L. Song, S.-R. Zhang, H.-Z. Sun and Z.-M. Su, *J. Mater. Chem. C* 2017, **5**, 10847-10854.
4. Z. Li, Y. Q. Dong, J. W. Y. Lam, J. Sun, A. Qin, M. Haeussler, Y. P. Dong, H. H. Y. Sung, I. D. Williams, H. S. Kwok and B. Z. Tang, *Adv. Funct. Mater.* 2009, **19**, 905-917.
5. P. Alam, G. Kaur, V. Kachwal, A. Gupta, A. R. Choudhury and I. R. Laskar, *J. Mater. Chem. C* 2015, **3**, 5450-5456.
6. W. Che, G. Li, X. Liu, K. Shao, D. Zhu, Z. Su and M. R. Bryce, *Chem Commun (Camb)*, 2018, **54**, 1730-1733.
7. J. H. Lee, J. Jaworski and J. H. Jung, *Nanoscale*, 2013, **5**, 8533-8540.
8. S. S. Nagarkar, A. V. Desai and S. K. Ghosh, *Chem Commun (Camb)*, 2014, **50**, 8915-8918.
